# Supplementary material for: Analysis of primer gunshot residue particles by laser induced breakdown spectroscopy and laser ablation inductively coupled plasma mass spectrometry
Source: Royal Society of Chemistry journal article supplement (doi:10.1039/d1an00689d), 2021-01-01
Supplement: d1an00689d1.pdf [file d1an00689d1.pdf]

*Analysis of primer gunshot residue particles by Laser Induced Breakdown Spectroscopy and  
Laser Ablation Inductively Coupled Plasma Mass Spectrometry*

Courtney Vander Pyl<sup>a</sup>, Claudia Martinez-Lopez<sup>a</sup>, PhD, MS, Korina Menking Hoggatt<sup>a</sup>, MS,  
Tatiana Trejos<sup>a\*</sup>, Ph.D.

<sup>a</sup>Department of Forensic and Investigative Science, West Virginia University, Morgantown, WV  
26506

\*submitting author:

Tatiana Trejos

[Tatiana.trejos@mail.wvu.edu](mailto:Tatiana.trejos@mail.wvu.edu)

## Supplementary material for the article titled:

### *Analysis of primer gunshot residue particles by Laser Induced Breakdown Spectroscopy and Laser Ablation Inductively Coupled Plasma Mass Spectrometry*

#### *S1. Elemental Heat Maps of Blank Carbon Adhesive GSR Collection Stubs*

For fast visualization for interpreting the presence or absence of an element in a single micro-area, heat maps were creating using the SNR ratios of elemental profiles for each ablation spot. Heat maps for leaded and non-leaded *p*GSR standards can be seen in the main manuscripts as Figure 4 and Figure 5. Blank stubs were also analyzed for comparison to known GSR samples. Figure S1 below shows heat maps created from elemental intensities obtained during LA-ICP-MS analysis. Scales were matched to those of leaded and non-leaded heat maps, for each respective element. The blank heat maps show lower concentrations, represented as white colored spots, compared to heats maps created from known microparticle standards. All 25 spots were below the signal-to-noise threshold of 3, indicating the absence of monitored elements (i.e.  $^{138}\text{Ba}$ ,  $^{208}\text{Pb}$ ,  $^{121}\text{Sb}$ ,  $^{49}\text{Ti}$ ,  $^{64}\text{Zn}$ ). The heat maps provide a quick screening of any elements that may be present in the stub background prior to deposition of *p*GSR standards or collection from known shooters. No false positive results recorded from blank samples provides further confidence that future detection of IGSR elements on shooter samples indicates the presence of GSR particles.

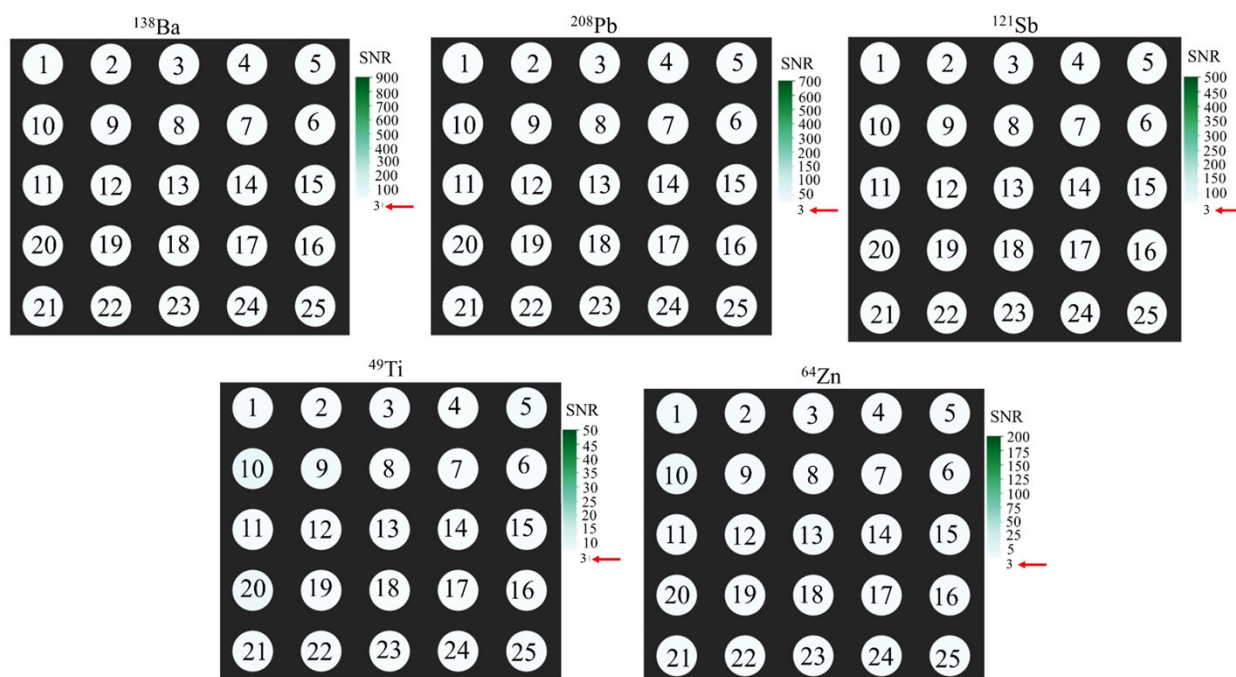

**Figure S1.** Heat maps created using LA-ICP-MS integrated area for blank sample for Ba, Pb, Sb, Ti and Zn). The threshold of SNR of 3 is pointed out with an arrow and is

represented here with the whitest shade in the scale. In this example, none of the spots were below the threshold. In this example, all ablated regions were below threshold ( $\text{SNR} \geq 3$ ).

*S2. Assessment of LA-ICP-MS analysis for the classification of authentic background and shooter samples*

*S2.1. Analysis of 60 individual background hand samples*

Hand samples were collected from sixty individuals who were considered “low-risk” for containing IGSR-like particles due to their occupations and non-recent use of a firearm. Occupations such as mechanics, police officers, and electricians, as well as anyone who had discharged a firearm less than 24 hours prior to collection, were avoided during sampling. The sixty individual samples are summarized below in Table S1. A background sample was considered a false positive 2 or more IGSR elements (e.g Pb, Ba, Sb) were detected in a single ablation spot. Four false positive samples were detected in the background population collected for this study. However, only one spot in the 25 spot ablation pattern showed presence of IGSR elements, for each of the contaminated individuals. The rest of the population (56 individuals) were pristine background samples with no detection of IGSR elements of interest.

Background hand samples were used to provide critical threshold amounts of elements in the general population. The critical thresholds were calculated as the mean of the 60 background samples plus 3 times the standard deviation. When applied to authentic shooter samples, if elements appeared above the critical threshold determined by the background hands samples, they were considered present. Conversely, if the elements in the authentic shooter samples appeared below the critical threshold, they were considered absent. The final critical thresholds calculated from the 60 hand samples were: 12.3  $^{208}\text{Pb}$ , 24.8  $^{138}\text{Ba}$ , 12.5  $^{121}\text{Sb}$ , 109.1,  $^{209}\text{Bi}$ , 154.7  $^{63}\text{Cu}$ , 96.2  $^{64}\text{Zn}$ , and 266.0  $^{49}\text{Ti}$ .

**Table S1.** Summary table of background hand sample classifications (N/A= not applicable as none of the target elements are anticipated in true negative backgrounds)

| <b>Sample</b> | <b>IGSR Elements Expected</b> | <b>IGSR Elements Detected</b> | <b>Classification</b> |
|---------------|-------------------------------|-------------------------------|-----------------------|
| Indiv_0<br>1  | N/A                           | ---                           | Negative              |
| Indiv_0<br>2  | N/A                           | ---                           | Negative              |
| Indiv_0<br>3  | N/A                           | ---                           | Negative              |
| Indiv_0<br>4  | N/A                           | ---                           | Negative              |
| Indiv_0<br>5  | N/A                           | ---                           | Negative              |
| Indiv_0<br>6  | N/A                           | Sb, Ba (1 spot)               | False Positive        |
| Indiv_0<br>7  | N/A                           | ---                           | Negative              |
| Indiv_0       | N/A                           | ---                           | Negative              |

|           |     |                     |                |
|-----------|-----|---------------------|----------------|
| 8         |     |                     |                |
| Indiv_0_9 | N/A | Pb, Ba, Sb (1 spot) | False Positive |
| Indiv_1_0 | N/A | Pb, Sb (1 spot)     | False Positive |
| Indiv_1_1 | N/A | ---                 | Negative       |
| Indiv_1_2 | N/A | ---                 | Negative       |
| Indiv_1_3 | N/A | ---                 | Negative       |
| Indiv_1_4 | N/A | ---                 | Negative       |
| Indiv_1_5 | N/A | ---                 | Negative       |
| Indiv_1_6 | N/A | ---                 | Negative       |
| Indiv_1_7 | N/A | ---                 | Negative       |
| Indiv_1_8 | N/A | ---                 | Negative       |
| Indiv_1_9 | N/A | ---                 | Negative       |
| Indiv_2_0 | N/A | Ba, Pb (1 spot)     | False Positive |
| Indiv_2_1 | N/A | ---                 | Negative       |
| Indiv_2_2 | N/A | ---                 | Negative       |
| Indiv_2_3 | N/A | ---                 | Negative       |
| Indiv_2_4 | N/A | ---                 | Negative       |
| Indiv_2_5 | N/A | ---                 | Negative       |
| Indiv_2_6 | N/A | ---                 | Negative       |
| Indiv_2_7 | N/A | ---                 | Negative       |
| Indiv_2_8 | N/A | ---                 | Negative       |
| Indiv_2_9 | N/A | ---                 | Negative       |
| Indiv_3_0 | N/A | ---                 | Negative       |
| Indiv_3_1 | N/A | ---                 | Negative       |
| Indiv_3_2 | N/A | ---                 | Negative       |
| Indiv_3_3 | N/A | ---                 | Negative       |
| Indiv_3_4 | N/A | ---                 | Negative       |

|              |     |     |          |
|--------------|-----|-----|----------|
| 4            |     |     |          |
| Indiv_3<br>5 | N/A | --- | Negative |
| Indiv_3<br>6 | N/A | --- | Negative |
| Indiv_3<br>7 | N/A | --- | Negative |
| Indiv_3<br>8 | N/A | --- | Negative |
| Indiv_3<br>9 | N/A | --- | Negative |
| Indiv_4<br>0 | N/A | --- | Negative |
| Indiv_4<br>1 | N/A | --- | Negative |
| Indiv_4<br>2 | N/A | --- | Negative |
| Indiv_4<br>3 | N/A | --- | Negative |
| Indiv_4<br>4 | N/A | --- | Negative |
| Indiv_4<br>5 | N/A | --- | Negative |
| Indiv_4<br>6 | N/A | --- | Negative |
| Indiv_4<br>7 | N/A | --- | Negative |
| Indiv_4<br>8 | N/A | --- | Negative |
| Indiv_4<br>9 | N/A | --- | Negative |
| Indiv_5<br>0 | N/A | --- | Negative |
| Indiv_5<br>1 | N/A | --- | Negative |
| Indiv_5<br>2 | N/A | --- | Negative |
| Indiv_5<br>3 | N/A | --- | Negative |
| Indiv_5<br>4 | N/A | --- | Negative |
| Indiv_5<br>5 | N/A | --- | Negative |
| Indiv_5<br>6 | N/A | --- | Negative |
| Indiv_5<br>7 | N/A | --- | Negative |
| Indiv_5<br>8 | N/A | --- | Negative |
| Indiv_5<br>9 | N/A | --- | Negative |
| Indiv_6      | N/A | --- | Negative |

|   |  |  |  |
|---|--|--|--|
| 0 |  |  |  |
|---|--|--|--|

### *S2.2. Analysis of 37 individual authentic shooter samples using standard ammunition*

Authentic shooter hand samples were collected from individuals immediately discharging 5 rounds of standard ammunition from either a pistol or revolver firearm. Four stubs were collected from each individual (left hand back, left hand palm, right hand back, right hand palm). Out of the four stubs, the one determined to have highest intensities of IGSR elements by LIBS was chosen to be analyzed by LA-ICP-MS. All of the standard ammunition used in this study contained the elements lead, barium, and antimony as major IGSR markers. Sample data was assessed using the previous determined critical thresholds of 12.3  $^{208}\text{Pb}$ , 24.8  $^{138}\text{Ba}$ , 12.5  $^{121}\text{Sb}$ , 109.1. Much like background hand samples, an ablation spot was considered positive if 2 or more elements of interest were present above the critical threshold and negative if one or no elements were detected above thresholds. A summary of all 37 individual samples can be seen below in Table S2.

All 37 individuals tested positive for IGSR elements of interest, and were categorized as characteristic classifications according to the ASTM 1588-20 guidelines for GSR analysis by SEM-EDS<sup>1</sup>. However, in a previous characterization study performed by our group, one standard ammunition manufactured by TulAmmo did not contain the major IGSR element of Ba. Therefore, TulAmmo (TUL) samples that detected Ba, along with Sb and Pb were considered to have memory effect from the firearm. The presence of barium arose from memory effect and shooting range carry over that is described in-depth in Section 3.4.2 of the main manuscript. Still, only 3 of 37 individuals were effected by memory of the firearm, leading to performance rates of 91.8% true positives and 8.2% true negatives, therefore providing evidence that LA-ICP-MS analysis is a useful tool in the screening of GSR hand samples collected from suspected shooters.

**Table S2.** Summary table of standard shooter hand sample classifications by LA-ICP-MS

| <b>Sample</b> | <b>Ammunition</b> | <b>Firearm</b> | <b>Standard IGSR Elements Expected in Primer</b> | <b>IGSR Elements Detected</b> | <b>Classification</b>     | <b>Number of Spots with Memory Effect Detected (X/25)</b> |
|---------------|-------------------|----------------|--------------------------------------------------|-------------------------------|---------------------------|-----------------------------------------------------------|
| Indiv_0_1     | REM               | 9mm Pistol     | Pb, Ba, Sb                                       | Pb, Ba, Sb                    | Positive (characteristic) | 0                                                         |
| Indiv_0_2     |                   |                |                                                  | Pb, Ba, Sb                    | Positive (characteristic) | 0                                                         |
| Indiv_0_3     |                   |                |                                                  | Pb, Ba, Sb                    | Positive (characteristic) | 0                                                         |
| Indiv_0_4     |                   |                |                                                  | Pb, Ba, Sb                    | Positive (characteristic) | 0                                                         |
| Indiv_0_5     |                   |                |                                                  | Pb, Ba, Sb                    | Positive (characteristic) | 0                                                         |
| Indiv_0_6     |                   |                |                                                  | Pb, Ba, Sb                    | Positive (characteristic) | 0                                                         |
| Indiv_0_7     |                   |                |                                                  | Pb, Ba, Sb                    | Positive (characteristic) | 0                                                         |
| Indiv_0_8     |                   |                |                                                  | Pb, Ba, Sb                    | Positive (characteristic) | 0                                                         |
| Indiv_0_9     |                   |                |                                                  | Pb, Ba, Sb                    | Positive (characteristic) | 0                                                         |
| Indiv_1_0     |                   | 9mm Revolver   |                                                  | Pb, Ba, Sb                    | Positive (characteristic) | 0                                                         |
| Indiv_1_1     |                   |                |                                                  | Pb, Ba, Sb                    | Positive (characteristic) | 0                                                         |
| Indiv_1_2     |                   |                |                                                  | Pb, Ba, Sb                    | Positive (characteristic) | 0                                                         |
| Indiv_1_3     |                   |                |                                                  | Pb, Ba, Sb                    | Positive (characteristic) | 0                                                         |
| Indiv_1_4     |                   | WIN            |                                                  | 9mm Pistol                    | Pb, Ba, Sb                | Pb, Ba, Sb                                                |
| Indiv_1_5     | Pb, Ba, Sb        |                | Positive (characteristic)                        |                               |                           | 0                                                         |
| Indiv_1_6     | Pb, Ba, Sb        |                | Positive (characteristic)                        |                               |                           | 0                                                         |
| Indiv_1_7     | Pb, Ba, Sb        |                | Positive (characteristic)                        |                               |                           | 0                                                         |

|              |        |                  |            |            |                              |    |
|--------------|--------|------------------|------------|------------|------------------------------|----|
| Indiv_1<br>8 |        |                  |            | Pb, Ba, Sb | Positive<br>(characteristic) | 0  |
| Indiv_1<br>9 |        |                  |            | Pb, Ba, Sb | Positive<br>(characteristic) | 0  |
| Indiv_2<br>0 |        |                  |            | Pb, Ba, Sb | Positive<br>(characteristic) | 0  |
| Indiv_2<br>1 |        |                  |            | Pb, Ba, Sb | Positive<br>(characteristic) | 0  |
| Indiv_2<br>2 | Blazer | 9mm Pistol       | Pb, Ba, Sb | Pb, Ba, Sb | Positive<br>(characteristic) | 0  |
| Indiv_2<br>3 |        |                  |            | Pb, Ba, Sb | Positive<br>(characteristic) | 0  |
| Indiv_2<br>4 |        |                  |            | Pb, Ba, Sb | Positive<br>(characteristic) | 0  |
| Indiv_2<br>5 |        |                  |            | Pb, Ba, Sb | Positive<br>(characteristic) | 0  |
| Indiv_2<br>6 |        |                  |            | Pb, Ba, Sb | Positive<br>(characteristic) | 0  |
| Indiv_2<br>7 | SAB    | 9mm Pistol       | Pb, Ba, Sb | Pb, Ba, Sb | Positive<br>(characteristic) | 0  |
| Indiv_2<br>8 |        |                  |            | Pb, Ba, Sb | Positive<br>(characteristic) | 0  |
| Indiv_2<br>9 |        |                  |            | Pb, Ba, Sb | Positive<br>(characteristic) | 0  |
| Indiv_3<br>0 | TUL    | 9mm Pistol       | Pb, Sb     | Pb, Ba, Sb | Positive (memory<br>effect)  | 25 |
| Indiv_3<br>1 |        |                  |            | Pb, Ba, Sb | Positive (memory<br>effect)  | 25 |
| Indiv_3<br>2 |        |                  |            | Pb, Ba, Sb | Positive (memory<br>effect)  | 25 |
| Indiv_3<br>3 | FED    | .357<br>Revolver | Pb, Ba, Sb | Pb, Ba, Sb | Positive<br>(characteristic) | 0  |
| Indiv_3<br>4 |        |                  |            | Pb, Ba, Sb | Positive<br>(characteristic) | 0  |
| Indiv_3<br>5 |        |                  |            | Pb, Ba, Sb | Positive<br>(characteristic) | 0  |
| Indiv_3      |        |                  |            | Pb, Ba, Sb | Positive                     | 0  |



|         |  |  |  |            |                              |   |
|---------|--|--|--|------------|------------------------------|---|
| 6       |  |  |  |            | (characteristic)             |   |
| Indiv_3 |  |  |  | Pb, Ba, Sb | Positive<br>(characteristic) | 0 |
| 7       |  |  |  |            |                              |   |

*S3. References*

1. ASTM International, *E1588-20: Standard Practice for Gunshot Residue Analysis by Scanning Electron Microscopy/Energy Dispersive Z-Ray Spectrometry*, West Conshohocken, 2020.
